# Supplementary material
Source: Springer Nature journal article supplement (https://www.springermedizin.de/resource/supplementary/12889_2007_1031_MOESM5_ESM.pdf/9503174)
Supplement: MOESM5 [file 9503174]

### a) Assortativity of primary links in groups

|               | pre-school | child    | teen      | adult     | senior  |
|---------------|------------|----------|-----------|-----------|---------|
|               | 0-5 yrs    | 6-10 yrs | 11-19 yrs | 20-64 yrs | 65+ yrs |
| 5th grade     | 3.1%       | 59.5%    | 9.5%      | 25.2%     | 2.7%    |
| 7th grade     | 1.5%       | 3.8%     | 81.4%     | 11.5%     | 1.8%    |
| 9-10th grade  | 0.3%       | 1.4%     | 83.2%     | 13.9%     | 1.1%    |
| 11-12th grade | 1.0%       | 2.0%     | 77.4%     | 17.8%     | 1.8%    |

### b) Assortativity of random contacts in public activities

|               | pre-school | child    | teen      | adult     | senior  |
|---------------|------------|----------|-----------|-----------|---------|
|               | 0-5 yrs    | 6-10 yrs | 11-19 yrs | 20-64 yrs | 65+ yrs |
| 5th grade     | 12.0%      | 29.3%    | 24.0%     | 28.7%     | 6.0%    |
| 7th grade     | 8.3%       | 18.2%    | 41.3%     | 23.1%     | 9.1%    |
| 9-10th grade  | 6.5%       | 11.0%    | 49.0%     | 23.2%     | 10.3%   |
| 11-12th grade | 4.8%       | 11.7%    | 47.9%     | 29.7%     | 5.8%    |
